# 1     **Number neurons in the nidopallium of young domestic chicks**

2     Dmitry Kobylkov<sup>1</sup>, Uwe Mayer<sup>1</sup>, Mirko Zanon<sup>1</sup>, Giorgio Vallortigara<sup>1\*</sup>

3     <sup>1</sup> Center for Mind/Brain Science, University of Trento, Rovereto, 38068, Italy.

4     \* Corresponding author: Giorgio Vallortigara

5     P.zza Manifattura, 1, 38068 Rovereto, Italy; tel. 0464 808676

6     email: [giorgio.vallortigara@unitn.it](mailto:giorgio.vallortigara@unitn.it)

7

## 8     **Classification**

9     Major category: Biological sciences

10    Minor categories: Psychological and Cognitive Sciences, Neuroscience

11    **Keywords:** NCL, numerosity, electrophysiology, birds, evolution

12

13

14

15

16

17

18

19

20

## 21    **Abstract**

22    Numerical cognition is ubiquitous in the animal kingdom. Domestic chicks are a  
 23    widely used developmental model for studying numerical cognition. Soon after  
 24    hatching, chicks can perform sophisticated numerical tasks. Nevertheless, the neural  
 25    basis of their numerical abilities has remained unknown. Here, we describe for the  
 26    first time number neurons in the caudal nidopallium (functionally equivalent to the  
 27    mammalian prefrontal cortex) of young domestic chicks. Number neurons that we  
 28    found in young chicks showed remarkable similarities to those in the prefrontal  
 29    cortex and caudal nidopallium of adult animals. Thus, our results suggest that  
 30    numerosity perception based on the labeled-line code provided by number neurons  
 31    might be an inborn feature of the vertebrate brain.

32

## 33    **Significance**

34    Numerosity, i.e. the number of items in a set, is a significant aspect in the perception  
 35    of the environment. Behavioural and in silico experiments suggest that number  
 36    sense belongs to a core knowledge system and can be present already at birth.  
 37    However, neurons sensitive to the number of visual items have been so far  
 38    described only in the brain of adult animals. Therefore, it remained unknown to what  
 39    extent their selectivity would depend on visual learning and experience. We found  
 40    number neurons in the caudal nidopallium (a higher associative area with functional  
 41    similarities to the mammalian prefrontal cortex) of very young, numerically naïve  
 42    domestic chicks. This result suggests that numerosity perception is possibly an  
 43    inborn feature of the vertebrate brain.

## 44 **Introduction**

45 Be it a number of conspecifics in a group (Balestrieri et al. 2019), a number of food  
 46 items (Hunt et al. 2008), or a number of motifs in a song (Templeton et al. 2005),  
 47 correct estimation of quantities is of vital importance for animals. Several behavioural  
 48 studies have confirmed that numerical competence is not a prerogative of human  
 49 beings, but is a widespread phenomenon in the animal kingdom (reviewed by Nieder  
 50 2019, Lorenzi et al. 2021). Mammals (Davis and Albert 1986, Ward and Smuts 2007,  
 51 Beran et al. 2008), birds (Lyon 2003, Templeton et al. 2005, Rugani et al. 2009),  
 52 reptilians (Gazzola et al. 2018), amphibians (Stancher et al. 2015), fishes (Potrich et  
 53 al. 2015), and invertebrates (Bortot et al. 2021), although evolutionary distant, all can  
 54 spontaneously assess quantities using an approximate number system (Brannon  
 55 and Merritt 2011).

56 For the approximate number system, which is based on the Weber-Fechner law  
 57 (Nieder 2016), the perception of cardinal numbers resembles the perception of  
 58 continuous physical stimuli. As a consequence, discrimination of quantities is  
 59 imprecise and depends on the numerical distance between stimuli. In other words, it  
 60 is easier to tell apart 5 and 10 than 9 and 10. Moreover, discrimination of quantities  
 61 becomes increasingly difficult with the numerical size. For a given numerical distance  
 62 (e.g., 1) it is easier to discriminate between numbers with low magnitudes (1 vs. 2),  
 63 than with high magnitudes (9 vs. 10).

64 Recent research has uncovered that the approximate number system relies on the  
 65 activity of a specific neuronal population. Neurons that respond to abstract  
 66 numerosity irrespective of objects' physical appearance (shape, colour, size) have  
 67 been found in the forebrain of human and non-human primates (Nieder 2012, Kutter

et al. 2018) and in crows (Ditz and Nieder 2015). In mammals, numerical responses were recorded in the parietal and the prefrontal cortices (PFC, Nieder 2012). In birds, similar neurons have been described in the caudolateral nidopallium (NCL, Ditz and Nieder 2015). The NCL is believed to be an analogue of the PFC in the avian brain (Güntürkün et al. 2021) and is involved in a variety of cognitive processes, including memory formation (Diekamp et al. 2002, Hahn et al. 2021), abstract rule learning (Veit and Nieder 2013), and action planning (Veit et al. 2015).

Both monkeys and crows are among the most evolutionary advanced species of their phylogenetic groups. They independently developed sophisticated intellectual capacities (Nieder et al. 2020) and both possess enlarged forebrains (Olkowicz et al., 2016). The neural representation of numerosities described in these species also shares remarkable similarities (Nieder et al. 2002, Ditz and Nieder 2015, Viswanathan and Nieder 2013, Wagener et al. 2018). In both species, the number neurons tuned to a preferred numerosity show a gradual decrease in firing rate to other numerosities (numerical distance effect). Their tuning curves are skewed towards larger numerosities and become progressively broader (less selective) with increasing numerosities (numerical size effect). However, it is unclear whether the presence of similar number neurons in these two species emerges as a consequence of their elaborate cognitive skills and enlarged forebrains. To understand the evolution of the number sense we need to explore its neural correlates in distant bird species with more ancestral traits.

Moreover, until now, number neurons have been described only in adult animals (e.g. Nieder et al. 2002, Sawamura et al. 2002, Viswanathan and Nieder 2013, Ditz and Nieder 2015, Wagener et al. 2018). At the same time, behavioural data from human infants (Izard et al. 2009) and young domestic chicks (Rugani et al. 2008,

2009) indicate that some core numerical abilities might be an inborn or spontaneously emerging (Kim et al. 2021, Nasr et al. 2019) property of the vertebrate brain. Testing the presence of number neurons in young and untrained organisms is crucial to verify this hypothesis.

In our study, we aimed to describe the neural correlates of the number sense in domestic chicks (*Gallus gallus*), which belong to a sister group of modern Neoaves (Prum et al. 2015). The domestic chick is a well-established developmental model for studying numerical cognition. Soon after hatching these birds are already capable of discriminating quantities (Rugani et al. 2008, 2013) and even performing basic arithmetic operations (Rugani et al. 2009). It has also been shown that young chicks represent numbers across the mental number line (Rugani et al. 2015), a cognitive ability that had been previously attributed only to humans.

We hypothesised that neural processing of numerical information in young untrained chicks might be similar to crows, despite them having been evolving independently over the last ~ 70 million years (Prum et al. 2015). In a domestic chicken, the NCL is morphologically different from that of corvids (von Eugen et al. 2020), but it is unclear whether this reflects any functional difference. Therefore, we decided to search for neural responses to numerical stimuli in the NCL of domestic chicks. For this purpose we habituated young chicks to a computer monitor, where numerical stimuli were presented (Fig. 1A). We explored neural responses to numerosities from 1 to 5. To control for non-numerical parameters we presented three different categories of stimuli: “radius-fixed”, “area-fixed”, and “perimeter-fixed” (Fig. 1B).

## Results

We recorded the activity of 471 units in the NCL of young domestic chicks and examined the mean firing rate of each unit during stimulus presentation (Fig. 2A-B). Among these units, 53 (11%) responded to numerosity irrespective of the stimulus type (henceforth “number neurons”, see Nieder 2016). This was revealed by a two-way ANOVA with the factors “numerosity” (5 levels: 1-5) and “stimulus type” (3 levels: “radius-fixed”, “area-fixed”, “perimeter-fixed”). The unit was considered as a number neuron only if the main effect of the factor “numerosity” was highly significant ( $p < 0.01$ ), but not the effect of the “stimulus type” or the interaction between the two factors. The numerosity that elicited the strongest neural response was defined as the preferred numerosity for this number neuron (after Ditz and Nieder 2015). Five examples of number neurons tuned to different numerosities are shown in Fig. 2C-G. The corresponding statistics are summarised in Table 1. The responses of all 53 number neurons are summarised in Fig. 3A (for statistical results see Table S1 in the supplementary materials, for an example of trials with numerical responses see Video S1 in the supplementary materials).

Most of the number neurons were tuned to the numerosity 1 (30%,  $N = 16$ ) and 5 (32%,  $N = 17$ ). However, we found neurons responsive to other numerosities as well (2: 11%,  $N = 6$ ; 3: 9%,  $N = 5$ ; 4: 17%,  $N = 9$ ), covering the whole range of tested numerosities (Fig. 2B).

When grouped by their preferred numerosity, the tuning curves of number neurons were asymmetric and increasingly wider towards larger numerosities (Fig. 3B). To quantify this numerical magnitude effect, we plotted neural filter functions of single neurons on four different scales: a linear scale, a power function with an exponent of

0.5, a power function with an exponent of 0.33, and a logarithmic (log2) scale. The neural filter functions became significantly more symmetric on a non-linear scale (Friedman test:  $X^2(3) = 10.653$ ;  $p = 0.014$ , Fig. 4A), with the linear scale significantly different from the power 0.33 and logarithmic scales (Nemenyi test:  $p = 0.022$  and  $p = 0.028$ , respectively), but not from the power 0.5 scale (Nemenyi test:  $p = 0.176$ ). The sigma of the Gaussian fit increased with numerosity only when plotted on a linear scale (Fig. 4B, slope of the linear fit = 0.17) but not with other non-linear scales (Fig. 4B, power 0.5: slope = -0.003, power 0.33: slope = -0.01, log2: slope = -0.03).

To evaluate the probability of finding false positive numerical responses in our dataset, we used the trial-shuffle method (1000 times for every recorded unit). After each shuffling we selected false-positive number neurons by the same statistical criteria described above. The proportion of real number neurons (11 %; 53 out of 471) was significantly higher than the proportion of false-positive units (0,95%; 4488 out of 471000) obtained by the analysis of randomly shuffled trials (proportion test:  $X^2(1) = 512,56$ ,  $p < 0.001$ ).

We further compared the tuning curves between the false positive number neurons and the real number neurons. For this, for each numerical category we randomly selected the same number of corresponding false-positive neurons as the actually recorded number neurons in that category (Fig 2B). We compared the tuning curves of the real and false-positive neurons (Fig 4C) computing a two-way ANOVA with the factors “absolute numerical distance” (5 levels: 0-4) and “data type” (2 levels: real/false positive). The response of real neurons decreased gradually with numerical distance, meaning that closest numerosities were more likely to trigger the number neurons. In contrast, the tuning curve of the false-positive neurons, which by chance happened to have higher firing rates for a random numerical stimulus, was

markedly different from real number neurons (interaction for the factor “numerical distance \* data type”:  $F_{(1,526)} = 6.275$ ;  $p = 0.01$ ).

We further described the selectivity of number neurons for unique numerosities by performing a post hoc analysis and comparing the response between the most preferred and other numerosities (Table 2). 9 out of 53 number neurons showed statistically different firing rates between the most-preferred and closest neighbouring numerosities. As expected from the numerical size effect, neurons tuned to lower numerosities are generally more selective than neurons coding for larger numerosities. 6 out of 16 neurons with the preferred numerosity 1 significantly decreased their firing rate in response to the numerosity 2. At the same time, out of 17 neurons that preferentially responded to the numerosity 5, only 1 neuron showed significantly lower response to the numerosity 4. The number neurons generally better differentiated between numerosities with increasing numerical distance (GLM for absolute numerical distance:  $X^2(18) = 3.935$ ,  $p = 0.047$ ; GLM for the log of the numerical distance:  $X^2(18) = 6.544$ ,  $p = 0.011$ ). This effect was more prominent when the numerical distance was calculated on the logarithmic scale: the GLM for the log of the numerical distance had a better fit than the GLM for absolute numerical distance ( $\Delta BIC = 6.36$ ). For the summary of all post hoc results, see TableS2 in the supplementary materials.

## Discussion

We recorded number neurons in 8-12 day old chicks, the youngest animals in which number neurons have been described so far. In the NCL of young domestic chicks, 11% of neurons showed a strong selective response to numerical stimuli, confirming



the role of this structure in avian numerical cognition. Moreover, our chicks were not trained in any numerical discrimination task. Instead, they were simply paying attention to the screen, where the numerical stimuli were presented (passive fixation, Hussar and Pasternak 2009). Thus, our young chicks can be considered numerically naïve (see Viswanathan and Nieder 2013).

This result is in line with previous studies on numerically naïve adult animals of distant lineages: 14% of neurons in the prefrontal cortex (PFC) of adult monkeys (Viswanathan and Nieder 2013) and 12% of neurons in the NCL of adult crows (Wagener et al. 2018) have shown numerical response. It is important to note that in any of these studies including our own, we cannot completely exclude a potential unsupervised learning effect due to a repeated exposure to numerical stimuli. Indeed, recent studies have found that in a deep neural network designed to analyse images, a similar amount of number detectors can emerge spontaneously (Nasr et al. 2019), even without pre-training (Kim et al. 2021). However, the hypothesis that number neurons can spontaneously emerge in the biological visual system has not been directly tested so far.

Our data, together with behavioural evidence from newly hatched domestic chicks (Rugani et al. 2008, 2009) and newborn infants (Izard et al. 2009), suggest that numerosity detection might be an inborn or spontaneously emerging feature of the brain. Our results certainly should not be automatically extrapolated to other newborn organisms, since the domestic chicken is a precocial species with a very rapid development after hatching. Nevertheless, even in 2-weeks-old chicks, the functional organization of the brain still remains immature and flexible (Zappia and Rogers 1987). Thus, the presence of number neurons in young chicks, which were not trained to discriminate any specific numerosity, supports the idea of an inborn

number sense. Moreover, since behavioural studies (Rugani et al. 2009, 2013) show that newly hatched chicks perceive numerical information, we might expect to find number neurons already at the first day after hatching.

The number neurons in domestic chicks showed very similar features to those observed in primates and crows (Viswanathan and Nieder 2013, Ditz and Nieder 2015, 2016). First, the number neurons we observed were tuned to specific numerosities, in accordance with the labelled-line code shown for the number neurons in the NCL of crows (Ditz and Nieder 2015, 2016). Second, chicks' number neurons showed a specific decay in response to non-preferred numerosities, which was similar to number neurons in other species and could not have been obtained by chance (see false-positive neurons in Fig. 4C). Third, we observed the numerical magnitude effect: the tuning curves of number neurons became wider with increased numerosity and more symmetrical when plotted on the non-linear scale (Fig. 3B). Also the selectivity of the neural response to non-preferred numerosities increased with the logarithm of the numerical distance, rather than with the absolute numerical distance.

The overall low selectivity to specific numerosity at a single-cell level, as revealed by the post hoc analysis (Table 2), appears to be similar to what was observed in other species (Viswanathan and Nieder 2013; Ditz and Nieder 2015, 2016). How brains can depict precise numerosities with such a noisy system may be explained by a population rate code (Nieder 2016). Single cells respond to every trial in a probabilistic way and only on average show increased firing rates to a given numerosity. Smooth tuning curves only emerge after the neural filter functions of many single cells tuned to the same numerosity are pooled together (Fig. 3B). For an animal to immediately assess numerosity, independent responses of several number

neurons should be averaged simultaneously over a large population. Thus, at the neural population level, stimulation by a specific numerosity would result in a distinct activation pattern. This hypothesis can be tested only by implementing methods that allow recording of single-cell activity over a large neural population.

Given these striking similarities between number neurons in the NCL of crows and chicks, it seems a reasonable guess that they share the same evolutionary origin. This, in turn, would mean that the neural mechanism of the number sense is not an advanced evolutionary adaptation of a few highly intelligent species. Number neurons in the NCL are likely an ancestral feature in avian species, since domestic chicks belong to the sister group of modern Neoaves (Prum et al. 2015).

While it is very tempting to go one step further and discuss the idea of the common evolutionary origin of number neurons for all vertebrates, this would be too speculative. The NCL in birds and the prefrontal cortex in mammals do share similar functions, but are not homologous structures (Güntürkün and Bugnyar 2016, Preuss and Wise 2021). Birds independently developed cortical brain regions, including the NCL, that enabled their high cognitive functions (Güntürkün et al. 2021) based on similar to mammalian pallial architecture (Stacho et al. 2020). The same is likely true also for the Dc (dorsal-central) region in the telencephalon of zebrafish, which has been recently shown to process numerical information (Messina et al. 2021). The possibility of a direct homology between the Dc and either the PFC or the NCL can only be addressed at a macroscopic level. These three regions likely belong to larger neocortex homologues in the respective species (Briscoe and Ragsdale 2019, but see Puelles 2017). However, given the developmental and morphological differences between these areas, new cortical subregions with similar functions must have appeared multiple times during independent evolution of these structures.

Two hypotheses can be put forward on the evolution of number sense in vertebrates. The first one is that number perception evolved independently several times in different phylogenetic groups, although our data strongly suggest that number neurons in the nidopallium are an ancestral trait of birds. This mechanism, however, still can be an adaptation that evolved in parallel to mammalian number neurons. In this case, the identical labelled-line coding scheme for numerosities adopted by birds and mammals might be computationally advantageous and, therefore, evolved independently in both groups (Ditz and Nieder 2015). The second hypothesis is that numerosity processing can be based upon an ancient core neural circuit shared among all vertebrates. In this case, we would expect to find numerosity responses in other, evolutionary conserved brain regions homologically shared among vertebrates (Lorenzi et al. 2021). Indeed, some indirect evidence suggests that at least a coarse estimation of quantity, i.e. more vs. less, might be present already at the subcortical level in humans (Collins et al. 2017) and in the midbrain of birds (Gusel'nikov et al. 1971) and zebrafish (Preuss et al. 2014).

These hypotheses are, however, not mutually exclusive. The putative ancestral neural circuit might be dedicated to assess continuous physical parameters normally associated with the numerosity, like total area of the stimulus. On the contrary, higher order brain processing leading to estimation of cardinal numerosities at a more abstract level may have developed several times, together with the independent evolution of new cortex homologue brain areas in distant phylogenetic groups (Striedter and Northcutt 2019).

Summing up, our study provides the first step in addressing a complex evolutionary and developmental aspect of numerical cognition. By implementing a simplified training procedure, we could, for the first time, demonstrate the existence of number

neurons in young numerically naïve domestic chicks. In the future, this method might be easily adopted for studying the neural correlates of numerical cognition in other brain regions, as well as in other species.

## Materials and methods

### Subjects

12 domestic chicks (*Gallus gallus domesticus*) of both sexes from the Aviagen ROSS 308 strain were used. Fertilized eggs were obtained from a local commercial hatchery (CRESCENTI Società Agricola S.r.l.–Allevamento Trepola–cod. Allevamento 127BS105/2). Eggs were incubated and hatched within incubators (Marans P140TU-P210TU) at a temperature of 37.7 °C, with 60% humidity in a dark room. After hatching in dark incubators, chicks were isolated and housed individually in metal cages (28 cm wide × 32 cm high × 40 cm deep) with food and water available *ad libitum*, at a constant room temperature of 30–32 °C and a constant light–dark regime of 14 h light and 10 h dark. All experimental protocols were approved by the research ethics committee of the University of Trento and by the Italian Ministry of Health (permit number 745/2021-PR).

### Experimental setup

The setup consisted of a rectangular shaped arena (28 X 40 X 32 cm; W X L X H) with metal walls that were grounded. In the centre of one of the shorter walls there was a circular opening (diameter 12 cm). A computer screen (AOC AGON AG271QG4, 144Hz) used for stimuli presentation was positioned directly behind the circular opening. Within the rectangular arena was a small wooden box 14 X 13 X 22

(W X L X H) cm whose frontal wall was made of a metal grid in. The box was placed 25 cm in front of the circular opening with the screen (Fig. 1A). During the experiments chicks remained inside the box from where they could observe the stimuli. Stimulus presentation was controlled by the PsychoPy toolbox (Pierce et al. 2019).

### **Habituation procedure**

The habituation occurred between the 3<sup>rd</sup> and the 6<sup>th</sup> day after hatching. On the 3<sup>rd</sup> day post hatching, chicks learned to peck on mealworms. During the day 4 after hatching, chicks were, first, habituated to the experimental setup and then to the number stimuli appearing on the screen. The birds received mealworms every time after the stimulus appeared on the screen, which motivated them to pay attention to the moment when any stimulus would appear. The stimuli were presented and rewarded randomly, so that chicks would not associate any particular numerosity with the reward. During the days 5 and 6 post hatching we gradually decreased the reward rate, so that birds would still pay attention to the screen even without getting a mealworm. This procedure allowed us to minimize rewarding during actual recording sessions.

### **Surgery and recordings**

On the 7<sup>th</sup> day after hatching chicks were fully anaesthetized using Isoflurane inhalation (1.5 – 2.0% gas volume, Vetflurane, 1000mg/g, Virbac, Italy) and placed in the stereotaxic apparatus with a bar fixed at the beaks' base and tilted 45° to ear bars. Local anaesthesia (Emla cream, 2.5% lidocaine + 2.5% prilocaine, AstraZeneca, S.p.A.) was applied to the ears and skull skin before and after the surgery. Metal screws were placed into the skull for grounding and stabilisation of

the implant. A small craniotomy was made in the skull on the right hemisphere above the NCL (1.0 mm anterior to the bregma, 4.5 mm lateral to the midline). For extracellular recordings we used self-wired tetrodes made out of formvar-insulated Nichrome wires (17.78  $\mu\text{m}$  diameter, A-M Systems, USA), which were gold-plated to reduce the impedance to 300 – 400 kOm (controlled by nanoZ, Plexon Inc., USA). Then, a commercially available Halo-5 microdrive (Neuralynx, USA) was assembled according to the producer instructions, where four single tetrodes were put into polymicro tubes (inner diameter 0.1 mm) and glued to the plastic shuttles. The microdrive was implanted and fixed first with quick adhesive silicone (Kwik-Sil, World Precision Instruments, USA) and then with dental cement (Henry Schein Krugg Srl, Italy). To increase the probability of finding number-responsive units, we did not glue the electrode tips within the tetrodes. We, thus, considered each tetrode as a brush-like arrangement of four single electrodes. Since in this brush arrangement the positions of the electrode tips can vary, some of the electrodes may have recorded signals from the same neurons. Hence, for sorting and subsequent analyses we chose only the best electrode from each tetrode at every recording position to avoid double-counting of the same neurons.

After the surgery, the chicks were left to recover until the next day in their home cages. Between the 8<sup>th</sup> and the 12<sup>th</sup> day after hatching we recorded neural responses to numerical stimuli in the NCL of chicks. Before every recording session the microdrive was connected to the Plexon system (Plexon Inc., USA) via a QuickClip connector and an omnetics headstage (Neuralynx, USA). After every recording session the tetrodes were manually advanced by 60 – 100  $\mu\text{m}$ .

Signals were pre-amplified with a 16-channel head-stage (20 $\times$ , Plexon Model number: PX.HST/16V-G20-LN) subsequently amplified 1000 $\times$ , digitalised and

filtered (300 Hz high-pass filter, 3 kHz low-pass filter and 50 Hz noise removal). Common average referencing (CAR) method (the averaged signal across channels) of the PlexControl system was used for referencing. Spikes were detected with the PlexControl software with an automatic 4-sigma threshold from the average noise level. Subsequently, spike sorting was performed manually in the Plexon Offline Sorter (see Figure S1 in supplementary information for examples of the raw signal and spike sorting).

## **Stimuli**

As numerical stimuli we used red dots outlined with a thin black line that appeared in the centre of the screen in a white background circle 6 cm in diameter. The size of stimuli ranged from 0.25 cm to 1.4 cm ( $0.6 - 3.2^\circ$ , Schmid and Wildsoet 1998). We explored neural responses to numerosities from 1 to 5. To control for visual parameters that might interfere with numerosity perception, during every recording session we presented three different types of stimuli (Fig. 1B). “Radius-fixed” type of stimuli consisted of dots with a fixed radius, meaning that area and perimeter increase with numerosity. “Area-fixed” stimuli have constant total area over all numerosities, while the total perimeter of the dots increases with numerosity. “Perimeter-fixed” stimuli have constant total perimeter over all numerosities, while total area of these stimuli decreases with numerosity. To further control that neurons do not respond to other visual parameters except for quantity, the inter-distance interval between dots varied randomly. Moreover, for every day of recording we created a new batch of stimuli consisting of 30 unique images for each numerosity/stimulus type combination. Numerosity stimuli were created using GeNEsIS software (Zanon et al. 2021).



During recording sessions we randomly presented stimuli for 500 ms with 2000 ms of inter-stimulus interval. Experiments were video-recorded using CineLAB system (Plexon Inc., USA). To enhance the motivation of birds to pay attention to the screen, random trials were occasionally rewarded. These trials were subsequently discarded from the analysis.

## **Histological analysis**

After the last neural recording birds were overdosed with the ketamine/xylazine solution (1:1 ketamine 10 mg/ml + xylazine 2 mg/ml). Electrolytic lesions were made at the recording sites by applying a high-voltage current to the tetrodes for 10-15 seconds. Then, the birds were perfused intracardially with the phosphate buffer (PBS; 0.1 mol, pH=7.4, 0.9% sodium chloride, 5 °C) followed by 4% paraformaldehyde (PFA). Brains were incubated for at least two days in PFA and further two days in 30% sucrose solution in PFA. Coronal 60 µm brain sections were cut at -20 °C using a cryostat (Leica CM1850 UV), mounted on glass slides, stained with the Giemsa dye (MG500, Sigma-Aldrich, St. Louis, USA), and cover slipped with Eukitt (FLUKA). Brain sections were examined under the stereomicroscope (Stemi 508, Carl Zeiss, Oberkochen, Germany) to estimate the anatomical position of recording sites.

## **Data analysis**

Based on the analysis of video-recordings, we selected only those trials, when birds were not rewarded. Since in birds there is an almost complete decussation of the optic fibres we recorded from the right hemisphere and we selected only trials, when birds looked at the stimulus with both eyes or with the contralateral (left) eye. For each recorded unit, we excluded trials with a firing rate of less than 1 Hz. For the

final analysis we considered only those units that were recorded for at least 7 trials for each numerosity and stimulus type (on average 23 trials per numerosity/stimulus type).

The neural activity of recorded units was analysed as the mean firing rate over 500 ms of stimulus presentation. To find numerosity-responsive neurons we performed two-way ANOVA with the numerosity (1 to 5) and the stimulus type (“radius-fixed”, “area-fixed”, “perimeter-fixed”) as factors. We considered the recorded neuron as numerosity-responsive if only the effect of the “numerosity” factor was highly significant ( $p < 0.01$ ), but not of the stimulus type or the interaction between the two factors. The numerosity that elicited the strongest neural response was defined as a preferred numerosity for this neuron.

For every number neuron we performed a post hoc analysis (Tukey’s test) to compare the neural response between the most preferred and other numerosities. To test for the numerical distance effect we applied a GLM for binomial data with the logit-link function. In the model, the proportion of neurons that significantly differentiate between given numerosities was taken as the response variable, and either the absolute numerical distance or the logarithm of the numerical distance was taken as a factor. We then compared the goodness-of-fit of these two models based on the difference in the Bayesian Information Criterion ( $\Delta BIC$ ), where the lower is the BIC value, the better is the model’s fit.

To validate the stability of our recordings we performed a cross-validation analysis. For each numerosity-responsive unit we calculated the preferred numerosity for the first and the second half of all trials separately. If the neural response to number stimuli was stable across the recording, we expected the Pearson’s correlation

between the first and the second half of the trials to be close to 1 for the whole population of number neurons. The cross-validation analysis showed a strong correlation of 0.82 ( $p < 0.001$ ) between the preferred numerosity in the first and the second half of the trials, confirming the stability of our recordings.

For every number neuron we normalised neural activity by setting the firing rate in response to the preferred numerosity at 100% and to the least preferred numerosity at 0%. The resulting neural filter functions were averaged by group based on the preferred numerosity, thus, creating numerosity tuning curves for e.g. neurons preferring numerosity 1, numerosity 2, etc.

To evaluate the chance level of finding false-positive numerical responses in our dataset, for every recorded neuron we shuffled all the trials for 1000 times and performed an ANOVA each time to select false-positive number neurons. We compared the proportion of false-positive and real number neurons with the proportion test. We further compared the tuning curves between the false-positive number neurons and the real number neurons. For this, we randomly sampled from the false-positive neurons the same number of neurons as the one of actually recorded number neurons. We compared the tuning curves of real and false-positive neurons performing a two-factor ANOVA with the interaction of “numerical distance” and “data type” (real/false positive).

According to the Weber-Fechner law, the perception of sensory stimuli (including quantities) is proportional to a logarithmic (Fechner 1860) or power scale (Stevens 1961) of stimulus magnitude. Therefore, when plotted on a linear scale, one might expect tuning curves to become increasingly asymmetric and wide with increasing numerosity. These properties are usually referred to as a numerical distance effect

and a numerical magnitude effect respectively. To evaluate the symmetry and the width of the neural filter functions we fitted the Gaussian function to the curves (MatLab Curve Fitting Toolbox) plotted on four different scales: linear, a power function with an exponent of 0.5, a power function with an exponent of 0.33, and a logarithmic (log2) scale (Ditz and Nieder 2016). The symmetry of the Gaussian fit was estimated based on R-squared ( $r^2$ ) values, i.e. the higher is  $r^2$  the better and more symmetric is the fit. The width of the Gaussian fit was reflected by its sigma ( $\sigma$ ). The four scaling methods were compared based on the  $r^2$  values by the Friedman's test for non-parametric data with repeated measures with the post-hoc pairwise comparison with the Nemenyi test. The relationship between the numerosity and the sigma of the Gaussian was tested by an ANOVA for different scaling methods separately.

All statistical analyses and visualization of the data was performed in R (R Core Team 2020) with packages "tidyverse", "ggplot2", and "PMCMRplus" and in MATLAB using custom-made scripts and the Curve Fitting Toolbox.

## Acknowledgments and funding sources

We are grateful to Anastasia Morandi-Raikova for her help with handling the chicks. Elena Lorenzi, Andrea Messina, and Matilde Perrino provided very valuable comments to the current manuscript. This work was supported by funding from the European Research Council (ERC) under the European Union's Horizon 2020 research and innovation program (Grant agreement no. 833504 SPANUMBRA) and from a PRIN 2017 ERC-SH4-A (2017PSRHPZ) to G. V.

## Author contributions

D.K, U.M. and G.V. designed the experiment. D.K. and U.M. established the procedure for behavioural training and electrophysiology in freely moving chicks. D.K. performed the experiment and analysed the data. M.Z. developed the numerical stimuli and contributed to apart of the data analysis. D.K. wrote the original draft of the manuscript and implemented the comments of all authors. U.M. and G.V. revised and edited the manuscript.

**Availability of data and material:** A summary table including the mean firing rates for all numerosity-responsive neurons for all trials is included as a supplementary data file. Any additional data that support the findings of this study are available from the corresponding author upon reasonable request.

**Code availability:** The custom codes that were used for data analysis are available from the corresponding author upon reasonable request.

**Competing financial interests:** The authors declare no competing financial interests.

## References

- Balestrieri, A., Gazzola, A., Pellitteri-Rosa, D. & Vallortigara, G. Discrimination of group numerosness under predation risk in anuran tadpoles. *Anim. Cogn.* **22**(2), 223-230 (2019). <https://doi.org/10.1007/s10071-019-01238-5>
- Beran, M. J., Evans, T. A. & Harris, E. H. Perception of food amounts by chimpanzees based on the number, size, contour length and visibility of items. *Anim. Behav.* **75**, 1793–1802 (2008). <https://doi.org/10.1016/j.anbehav.2007.10.035>
- Bortot, M., Regolin, L. & Vallortigara, G. A sense of number in invertebrates. *Biochem. Biophys. Res. Commun.* **564**, 37-42 (2021). <https://doi.org/10.1016/j.bbrc.2020.11.039>
- Brannon, E. M. & Merritt, D. J. Evolutionary foundations of the approximate number system. in *Space, time and number in the brain* (eds. Dehaene, S. & Brannon, E.M.) 207-224 (Academic Press, 2011). <https://doi.org/10.1016/B978-0-12-385948-8.00014-1>
- Briscoe, S. D. & Ragsdale, C. W. Evolution of the chordate telencephalon. *Curr. Biol.* **29**(13), 647-662 (2019). <https://doi.org/10.1016/j.cub.2019.05.026>
- Collins, E., Park, J. & Behrmann, M. Numerosity representation is encoded in human subcortex. *Proc. Natl Acad. Sci. USA* **114**(14), 2806-2815 (2017). <https://doi.org/10.1073/pnas.1613982114>
- Davis, H. & Albert, M. Numerical discrimination by rats using sequential auditory stimuli. *Animal Learning & Behavior* **14**(1), 57-59 (1986). <https://doi.org/10.3758/BF03200037>

- 524 Diekamp, B., Kalt, T. & Güntürkün, O. Working memory neurons in pigeons. *J.*  
525 *Neurosci.* **22**(4), RC210-R210 (2002). <https://doi.org/10.1523/JNEUROSCI.22-04->  
526 [j0002.2002](https://doi.org/10.1523/JNEUROSCI.22-04-j0002.2002)
- 527 Ditz, H. M. & Nieder, A. Neurons selective to the number of visual items in the corvid  
528 songbird endbrain. *Proc. Natl Acad. Sci. USA* **112**(25), 7827-7832 (2015).  
529 <https://doi.org/10.1073/pnas.1504245112>
- 530 Ditz, H. M. & Nieder, A. Numerosity representations in crows obey the Weber–  
531 Fechner law. *Proc. R. Soc. B Biol. Sci.* **283**(1827), 20160083 (2016).  
532 <https://doi.org/10.1098/rspb.2016.0083>
- 533 Fechner, G. T. *Elemente der psychophysik* (Vol. 2). (Breitkopf u. Härtel, 1860).
- 534 Gazzola, A., Vallortigara, G. & Pellitteri-Rosa, D. Continuous and discrete quantity  
535 discrimination in tortoises. *Biol. Lett.* **14**(12), 20180649 (2018).  
536 <https://doi.org/10.1098/rsbl.2018.0649>
- 537 Güntürkün, O. & Bugnyar, T. Cognition without cortex. *Trends Cogn. Sci.* **20**(4), 291-  
538 303 (2016). <https://doi.org/10.1016/j.tics.2016.02.001>
- 539 Güntürkün, O., von Eugen, K., Packheiser, J. & Pusch, R. Avian pallial circuits and  
540 cognition: A comparison to mammals. *Curr. Opin. Neurobiol.* **71**, 29-36 (2021).  
541 <https://doi.org/10.1016/j.conb.2021.08.007>
- 542 Gusel'nikov, V. I., Morenkov, É. D. & Gutsu, I. P. Responses of neurons in the  
543 pigeon's optic tectum to visual stimuli. *Neurophysiology* **3**(1), 78-83 (1971).

- 544 Hahn, L. A., Balakhonov, D., Fongaro, E., Nieder, A. & Rose, J. Working memory  
545 capacity of crows and monkeys arises from similar neuronal computations. *eLife* **10**,  
546 e72783 (2021). DOI: 10.7554/eLife.72783
- 547 Hunt, S., Low, J. & Burns, K. C. Adaptive numerical competency in a food-hoarding  
548 songbird. *Proc. R. Soc. B Biol. Sci.* **275**(1649), 2373-2379 (2008).  
549 <https://doi.org/10.1098/rspb.2008.0702>
- 550 Hussar, C. R. & Pasternak, T. Flexibility of sensory representations in prefrontal  
551 cortex depends on cell type. *Neuron* **64**(5), 730-743 (2009).  
552 <https://doi.org/10.1016/j.neuron.2009.11.018>
- 553 Izard, V., Sann, C., Spelke, E. S. & Streri, A. Newborn infants perceive abstract  
554 numbers. *Proc. Natl. Acad. Sci. USA* **106**(25), 10382-10385 (2009).  
555 <https://doi.org/10.1073/pnas.0812142106>
- 556 Kim, G., Jang, J., Baek, S., Song, M. & Paik, S. B. Visual number sense in untrained  
557 deep neural networks. *Sci. Adv.* **7**(1), eabd6127 (2021). DOI:  
558 10.1126/sciadv.abd6127
- 559 Kutter, E. F., Bostroem, J., Elger, C. E., Mormann, F. & Nieder, A. Single neurons in  
560 the human brain encode numbers. *Neuron* **100**(3), 753-761 (2018).  
561 <https://doi.org/10.1016/j.neuron.2018.08.036>
- 562 Lorenzi, E., Perrino, M. & Vallortigara, G. Numerosities and Other Magnitudes in the  
563 Brains: A Comparative View. *Front. Psychol.* **12**, 1104 (2021).  
564 <https://doi.org/10.3389/fpsyg.2021.641994>
- 565 Lyon, B. E. Egg recognition and counting reduce costs of avian conspecific brood  
566 parasitism. *Nature* **422**, 495–499 (2003). <https://doi.org/10.1038/nature01505>



567 Messina, A., Potrich, D., Schiona, I., Sovrano, V.A., Fraser, S.E., Brennan, C.H. &  
568 Vallortigara, G. Neurons in the dorso-central division of zebrafish pallium respond to  
569 change in visual numerosity. *Cereb. Cortex.*, bhab218 (2021). DOI:  
570 10.1093/cercor/bhab218

571 Nasr, K., Viswanathan, P. & Nieder, A. Number detectors spontaneously emerge in a  
572 deep neural network designed for visual object recognition. *Sci. Adv.* **5**(5), eaav7903  
573 (2019). DOI: 10.1126/sciadv.aav7903

574 Nieder, A. Supramodal numerosity selectivity of neurons in primate prefrontal and  
575 posterior parietal cortices. *Proc. Natl. Acad. Sci. USA* **109**(29), 11860-11865 (2012).  
576 <https://doi.org/10.1073/pnas.1204580109>

577 Nieder, A. The neuronal code for number. *Nat. Rev. Neurosci.* **17**(6), 366-382  
578 (2016). <https://doi.org/10.1038/nrn.2016.40>

579 Nieder, A. *A brain for numbers: the biology of the number instinct*. (MIT press, 2019).

580 Nieder, A., Freedman, D. J. & Miller, E. K. Representation of the quantity of visual  
581 items in the primate prefrontal cortex. *Science* **297**(5587), 1708-1711 (2002). DOI:  
582 10.1126/science.1072493

583 Nieder, A., Wagener, L. & Rinnert, P. A neural correlate of sensory consciousness in  
584 a corvid bird. *Science* **369**(6511), 1626-1629 (2020). DOI: 10.1126/science.abb1447

585 Olkowicz, S., Kocourek, M., Lučan, R.K., Porteš, M., Fitch, W.T., Herculano-Houzel,  
586 S. & Němec, P. Birds have primate-like numbers of neurons in the forebrain. *Proc.*  
587 *Natl. Acad. Sci. USA* **113**(26), 7255-7260 (2016).  
588 <https://doi.org/10.1073/pnas.1517131113>

589 Peirce, J., Gray, J.R., Simpson, S., MacAskill, M., Höchenberger, R., Sogo, H.,  
590 Kastman, E. and Lindeløv, J.K. PsychoPy2: Experiments in behavior made  
591 easy. *Behav. Res. Methods* **51**(1), 195-203 (2019). [https://doi.org/10.3758/s13428-](https://doi.org/10.3758/s13428-018-01193-y)  
592 018-01193-y

593 Potrich, D., Sovrano, V. A., Stancher, G. & Vallortigara, G. Quantity discrimination by  
594 zebrafish (*Danio rerio*). *J. Comp. Psychol.* **129**(4), 388 (2015).  
595 <https://doi.org/10.1037/com0000012>

596 Preuss, S. J., Trivedi, C. A., vom Berg-Maurer, C. M., Ryu, S. & Bollmann, J. H.  
597 Classification of object size in retinotectal microcircuits. *Curr. Biol.* **24**(20), 2376-2385  
598 (2014). <https://doi.org/10.1016/j.cub.2014.09.012>

599 Preuss, T. M. & Wise, S. P. Evolution of prefrontal cortex.  
600 *Neuropsychopharmacology* **47**(1), 3-19 (2022). [https://doi.org/10.1038/s41386-021-](https://doi.org/10.1038/s41386-021-01076-5)  
601 01076-5

602 Prum, R.O., Berv, J.S., Dornburg, A., Field, D.J., Townsend, J.P., Lemmon, E.M. &  
603 Lemmon, A.R. A comprehensive phylogeny of birds (Aves) using targeted next-  
604 generation DNA sequencing. *Nature* **526**(7574), 569-573 (2015).  
605 <https://doi.org/10.1038/nature15697>

606 Puelles, L. Comments on the updated tetrapartite pallium model in the mouse and  
607 chick, featuring a homologous claustrinsular complex. *Brain Behav. Evol.* **90**(2),  
608 171-189 (2017). <https://doi.org/10.1159/000479782>

609 R Core Team (2020). R: A language and environment for statistical computing. R  
610 Foundation for Statistical Computing, Vienna, Austria. URL [https://www.R-](https://www.R-project.org/)  
611 [project.org/](https://www.R-project.org/)

612 Rugani, R., Cavazzana, A., Vallortigara, G. & Regolin, L. One, two, three, four, or is  
613 there something more? Numerical discrimination in day-old domestic chicks. *Anim.*  
614 *Cogn.* **16**(4), 557-564 (2013). DOI 10.1007/s10071-012-0593-8

615 Rugani, R., Fontanari, L., Simoni, E., Regolin, L. & Vallortigara, G. Arithmetic in  
616 newborn chicks. *Proc. R. Soc. B Biol. Sci.* **276**(1666), 2451-2460 (2009).  
617 <https://doi.org/10.1098/rspb.2009.0044>

618 Rugani, R., Regolin, L. & Vallortigara, G. Discrimination of small numerosities in  
619 young chicks. *J. Exp. Psychol. Anim. Behav. Process.* **34**(3), 388 (2008).  
620 <https://doi.org/10.1037/0097-7403.34.3.388>

621 Rugani, R., Vallortigara, G., Priftis, K. & Regolin, L. Number-space mapping in the  
622 newborn chick resembles humans' mental number line. *Science* **347**(6221), 534-536  
623 (2015). DOI: 10.1126/science.aaa1379

624 Sawamura, H., Shima, K. & Tanji, J. Numerical representation for action in the  
625 parietal cortex of the monkey. *Nature* **415**(6874), 918-922 (2002).  
626 <https://doi.org/10.1038/415918a>

627 Schmid, K. L. & Wildsoet, C. F. Assessment of visual acuity and contrast sensitivity  
628 in the chick using an optokinetic nystagmus paradigm. *Vision Res.* **38**(17), 2629-  
629 2634 (1998). [https://doi.org/10.1016/S0042-6989\(97\)00446-X](https://doi.org/10.1016/S0042-6989(97)00446-X)

630 Stacho, M., Herold, C., Rook, N., Wagner, H., Axer, M., Amunts, K. & Güntürkün, O.  
631 A cortex-like canonical circuit in the avian forebrain. *Science* **369**(6511), (2020). DOI:  
632 10.1126/science.abc5534

- 633 Stancher, G., Rugani, R., Regolin, L. & Vallortigara, G. Numerical discrimination by  
634 frogs (*Bombina orientalis*). *Anim. Cogn.* **18**(1), 219-229 (2015). DOI 10.1007/s10071-  
635 014-0791-7
- 636 Stevens, S. S. To honor Fechner and repeal his law. *Science* **133**(3446), 80-86  
637 (1961).
- 638 Striedter, G. F. & Northcutt, R. G. *Brains through time: a natural history of*  
639 *vertebrates*. (Oxford University Press, 2019).
- 640 Templeton, C. N., Greene, E. & Davis, K. Allometry of alarm calls: black-capped  
641 chickadees encode information about predator size. *Science* **308**, 1934–1937  
642 (2005). DOI: 10.1126/science.1108841
- 643 Veit, L. & Nieder, A. Abstract rule neurons in the endbrain support intelligent  
644 behaviour in corvid songbirds. *Nat. Commun.* **4**(1), 1-11 (2013).  
645 <https://doi.org/10.1038/ncomms3878>
- 646 Veit, L., Pidpruzhnykova, G. & Nieder, A. Associative learning rapidly establishes  
647 neuronal representations of upcoming behavioral choices in crows. *Proc. Natl. Acad.*  
648 *Sci. USA* **112**(49), 15208-15213 (2015). <https://doi.org/10.1073/pnas.1509760112>
- 649 Viswanathan, P. & Nieder, A. Neuronal correlates of a visual “sense of number” in  
650 primate parietal and prefrontal cortices. *Proc. Natl. Acad. Sci. USA* **110**(27), 11187-  
651 11192 (2013). <https://doi.org/10.1073/pnas.1308141110>
- 652 von Eugen, K., Tabrik, S., Güntürkün, O. & Ströckens, F. A comparative analysis of  
653 the dopaminergic innervation of the executive caudal nidopallium in pigeon, chicken,  
654 zebra finch, and carrion crow. *J. Comp. Neurol.* **528**(17), 2929-2955 (2020).  
655 <https://doi.org/10.1002/cne.24878>

Wagener, L., Loconsole, M., Ditz, H. M. & Nieder, A. Neurons in the endbrain of numerically naive crows spontaneously encode visual numerosity. *Curr. Biol.* **28**(7), 1090-1094 (2018). <https://doi.org/10.1016/j.cub.2018.02.023>

Ward, C. & Smuts, B. Quantity-based judgments in the domestic dog (*Canis lupus familiaris*). *Anim. Cogn.* **10**, 71-80 (2007). DOI 10.1007/s10071-006-0042-7

Zanon, M., Potrich, D., Bortot, M. & Vallortigara, G. Towards a standardization of non-symbolic numerical experiments: GeNEsIS, a flexible and user-friendly tool to generate controlled stimuli. *Behav. Res. Methods*, 1-12 (2021). <https://doi.org/10.3758/s13428-021-01580-y>

Zappia, J. V. & Rogers, L. J. Sex differences and reversal of brain asymmetry by testosterone in chickens. *Behav. Brain Res.* **23**(3), 261-267 (1987). [https://doi.org/10.1016/0166-4328\(87\)90026-X](https://doi.org/10.1016/0166-4328(87)90026-X)

## Figures

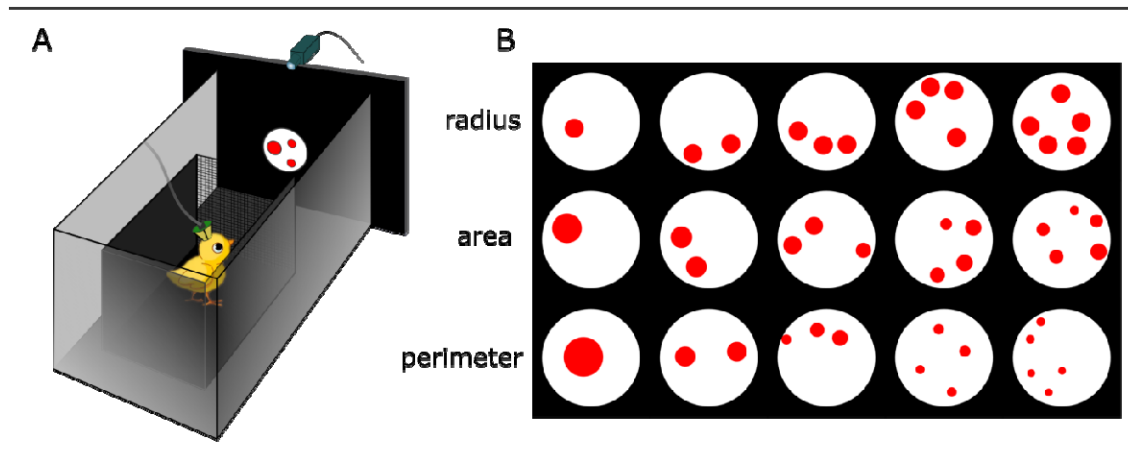

Figure 1. Experimental design. (A) Schematic drawing of the experimental setup. Young chicks were placed in a small wooden box in front of the screen, where numerical stimuli appeared. They were trained to pay attention to the stimuli without any further discrimination between different numerosities. (B) Examples of different types of numerosity stimuli that we presented by every neural recording: “radius-fixed”, “area-fixed”, and “perimeter-fixed”.

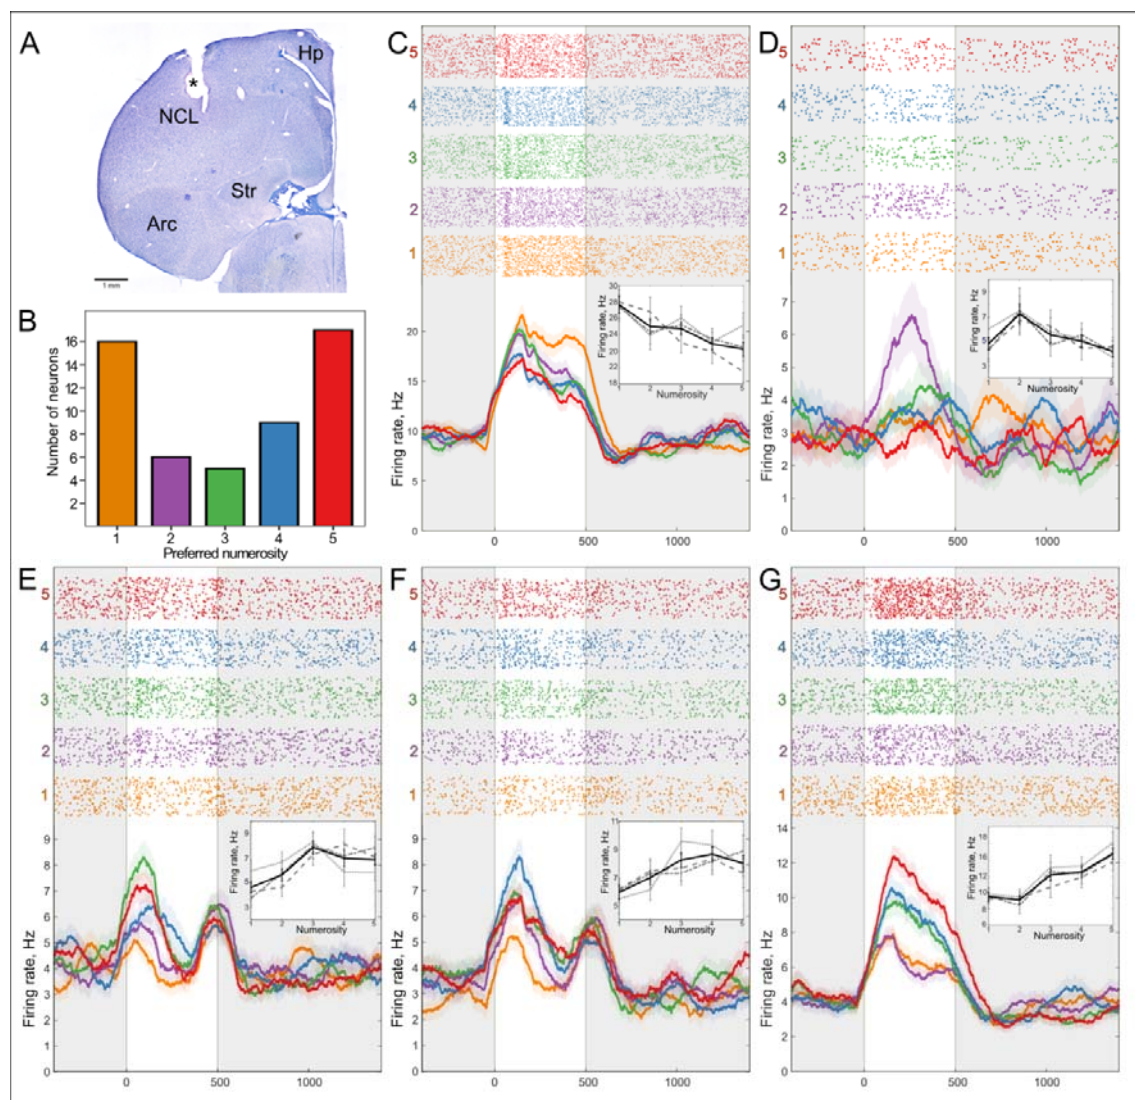

Figure 2. Neurons in the NCL of chicks responding to numerosity. (A) An exemplary coronal section of the chicken forebrain showing the recording site in the NCL (electrolytic lesion is marked by an asterisk). Arc: arcopallium, Hp: hippocampus, NCL: caudolateral nidopallium, Str: striatum. (B) Distribution of neurons that preferred each numerosity stimulus. Examples of neurons that were tuned to numerosity 1 (C), 2 (D), 3 (E), 4 (F), or 5 (G). Top: raster plots representing neural activity, where each line corresponds to one trial and each dot corresponds to a spike. Trials are grouped by numerosity. The 500-ms duration of the stimulus is marked by a transparent window. Bottom: averaged spike density functions

(smoothed by a 100 ms Gaussian kernel; SEM is plotted as a shaded area along the lines). Insert: average firing rate in response to numerosities of each stimulus type. Grey dotted line corresponds to “radius-fixed”, dashed line – to “perimeter-fixed”, dot-dashed line – to “area-fixed” stimuli, and black solid line – to an average. Error bars correspond to SEM.



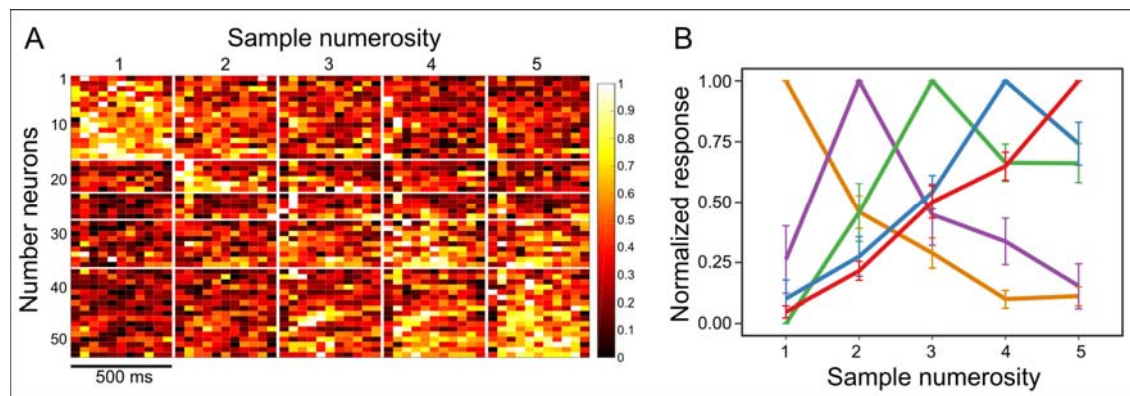

Figure 3. (A) Neural response of all recorded number neurons to numerosity stimuli. Heatmap values represent the mean firing rate during the stimulus presentation (binned by 50-ms), normalised [0, 1] for the corresponding neuron in each row. Values are further grouped by the numerosity stimuli from 1 to 5 (vertical white lines), and by the numerical preference of recorded neurons (horizontal white lines) from neurons that preferred numerosity 1 (top) to neurons that preferred numerosity 5 (bottom). (B) Average tuning curves of numerosity selective neurons. The neural activity of neurons is first normalised [0 = response to the least-preferred numerosity, 1 = response to the most-preferred numerosity] and then grouped by their most preferred numerosity. Error bars correspond to SEM.

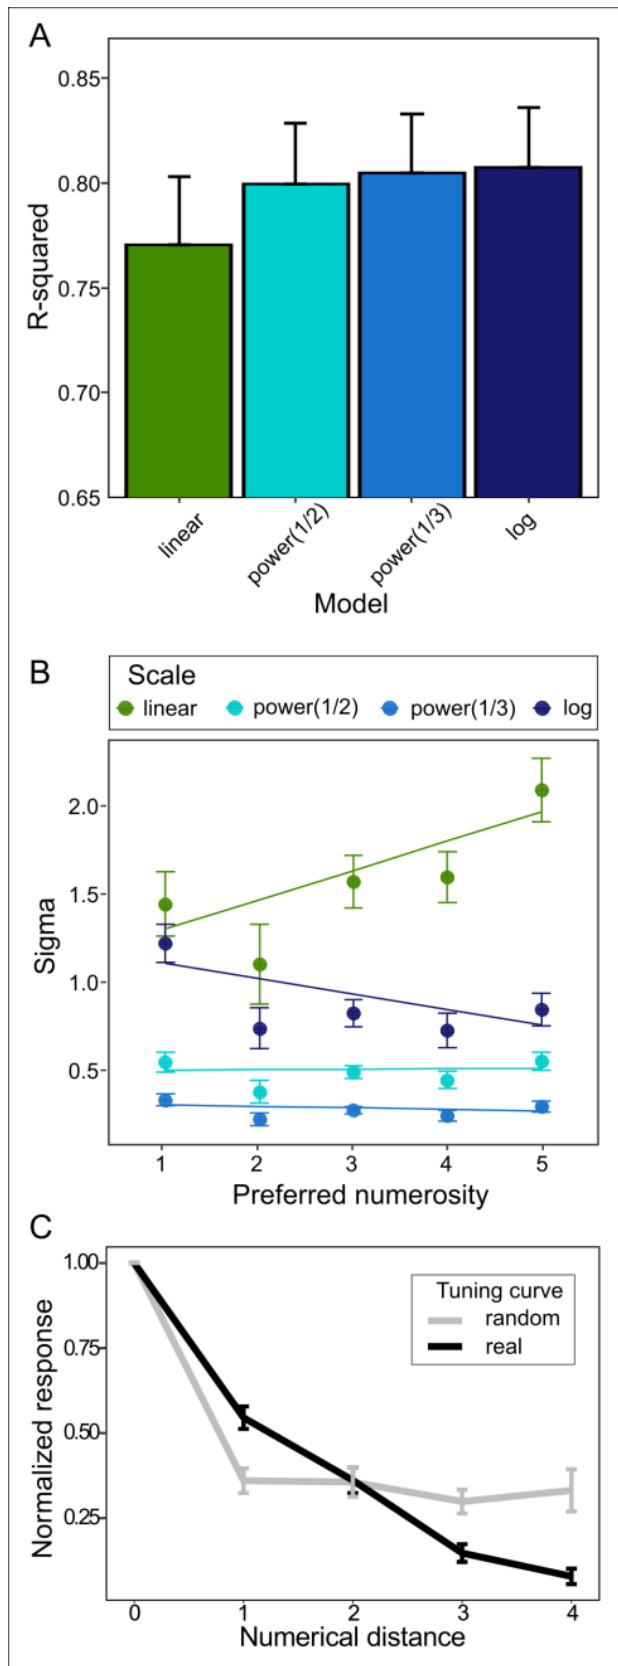

Figure 4. (A-B) Comparison of different scaling schemes for the tuning curves. (A) R-squared, a measure of goodness-of-fit reflects symmetry of the tuning curves plotted on the four different scales. The tuning curves of number neurons become more symmetric when plotted on the non-linear scale. (B) Sigma of the Gaussian fit for neurons preferring different numerosities. When plotted on the linear scale, the tuning curves become wider with increased numerosity. Error bars correspond to SEM. (C) Averaged normalised activity of all numerosity selective neurons compared to the random tuning curve (see Materials and methods section for details). The neural activity was normalised [0 = response to the least-preferred numerosity, 1 = response to the most-preferred numerosity] and then plotted as a function of absolute numerical distance from the most preferred numerosity. Neural response of numerosity selective neurons (black line) gradually decreased with the numerical distance. The slope of this tuning curve is notably different from the random tuning curve (grey line) of false-positive neurons obtained by random shuffling of trials. Error bars correspond to SEM.

## Tables

| Preferred numerosity | ANOVA (Firing rate ~ Stimulus type * Numerosity) |                            |                            |
|----------------------|--------------------------------------------------|----------------------------|----------------------------|
|                      | Numerosity                                       | Stimulus type              | Interaction                |
| num1                 | F(4,251)=5.7273, p < 0.001                       | F(2,251)=0.9275, p = 0.396 | F(8,251)=1.2411, p = 0.273 |
| num2                 | F(4,253)=3.5881, p = 0.007                       | F(2,253)=0.2355, p = 0.79  | F(8,253)=0.454, p = 0.887  |
| num3                 | F(4,496)=5.8789, p < 0.001                       | F(2,496)=0.1179, p = 0.889 | F(8,496)=1.4538, p = 0.173 |
| num4                 | F(4,308)=4.2385, p = 0.002                       | F(2,308)=0.1141, p = 0.892 | F(8,308)=0.9124, p = 0.506 |
| num5                 | F(4,355)=13.4938, p < 0.001                      | F(2,355)=1.832, p = 0.162  | F(8,355)=0.3219, p = 0.958 |

Table 1. Results of the two-way ANOVA for five example number neurons shown in the Figure 2 (C-G). Preferred numerosity: numerosity eliciting the strongest response. ANOVA results (F-statistics and p-value) for the factor “stimulus type” (“radius-fixed”, “area-fixed”, “perimeter-fixed”), “numerosity” (numerosity 1 to 5), or interaction between them.

| Summary |       | Number of neurons |      |      |      |      |
|---------|-------|-------------------|------|------|------|------|
| Sum     | Group | num1              | num2 | num3 | num4 | num5 |
| 16      | num1  |                   | 6    | 9    | 12   | 14   |
| 6       | num2  | 4                 |      | 2    | 1    | 3    |
| 5       | num3  | 5                 | 1    |      | 0    | 0    |
| 9       | num4  | 6                 | 2    | 1    |      | 1    |
| 17      | num5  | 15                | 12   | 6    | 1    |      |

Table 2. The summary of the post hoc analysis. For each group based on their preferred numerosity we calculated the number of neurons that showed significant difference between the most-preferred and the given numerosity.

## Supplementary information

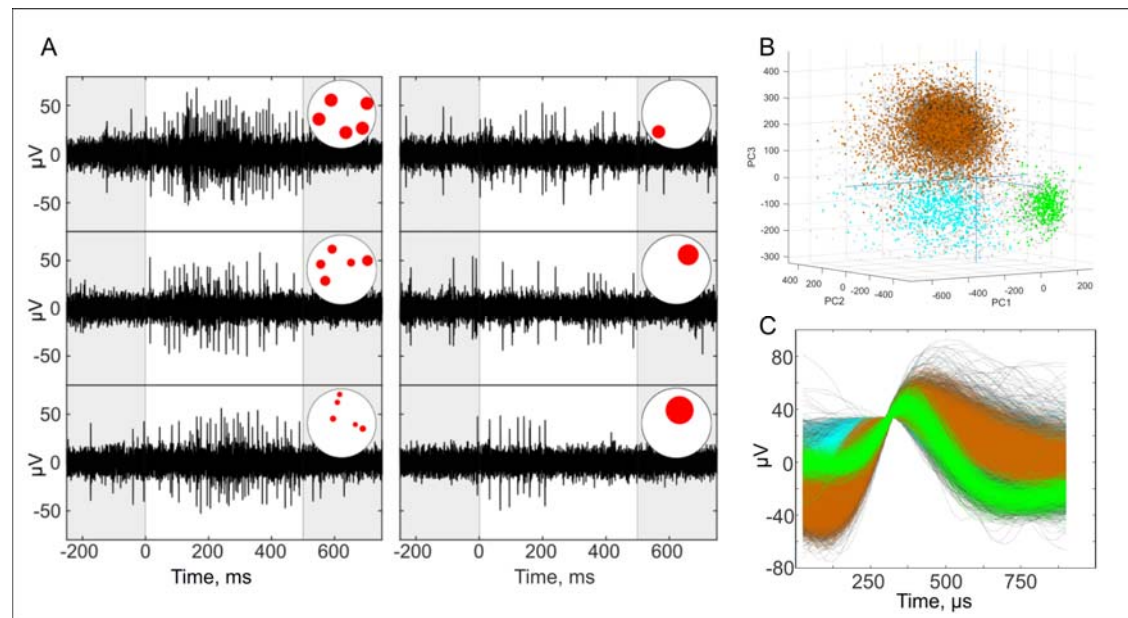

Figure S1. (A) Example of raw spike trains: electrical signal is shown after the high-pass filter was applied. Examples of single trials, representing neural response of the unit to numerosity 5 (left column), irrespective of the stimulus appearance (top: radius-fixed, middle: area-fixed, bottom: perimeter-fixed). Note the decreasing neural response to the numerosity 1 (right column). (B) The PCA clustering of the corresponding recording with waveforms of different units shown by different colours. The waveforms of the number-responsive unit are shown in orange, unsorted waveforms are shown in grey. (C) Spike waveforms of corresponding units isolated from the recording of one electrode.

| Unit | Preferred numerosity | ANOVA (Firing rate ~ Stimulus type * Numerosity) |                            |                            |
|------|----------------------|--------------------------------------------------|----------------------------|----------------------------|
|      |                      | Numerosity                                       | Stimulus type              | Interaction                |
| 1    | num1                 | F(4,546)=4.0327, p = 0.003                       | F(2,546)=0.5228, p = 0.593 | F(8,546)=1.4242, p = 0.183 |
| 2    | num1                 | F(4,197)=3.5672, p = 0.008                       | F(2,197)=0.4656, p = 0.628 | F(8,197)=0.8763, p = 0.537 |
| 3    | num1                 | F(4,202)=4.0268, p = 0.004                       | F(2,202)=1.7732, p = 0.172 | F(8,202)=1.1967, p = 0.303 |
| 4    | num1                 | F(4,565)=4.2588, p = 0.002                       | F(2,565)=0.0012, p = 0.999 | F(8,565)=0.7852, p = 0.616 |
| 5    | num1                 | F(4,270)=5.3565, p = 0                           | F(2,270)=1.2038, p = 0.302 | F(8,270)=0.9519, p = 0.474 |
| 6    | num1                 | F(4,270)=5.4507, p = 0                           | F(2,270)=0.0475, p = 0.954 | F(8,270)=0.7056, p = 0.687 |
| 7    | num1                 | F(4,239)=3.7861, p = 0.005                       | F(2,239)=0.4114, p = 0.663 | F(8,239)=1.6597, p = 0.109 |
| 8    | num1                 | F(4,419)=4.9175, p = 0.001                       | F(2,419)=1.0111, p = 0.365 | F(8,419)=1.0988, p = 0.363 |
| 9    | num1                 | F(4,399)=7.4226, p = 0                           | F(2,399)=2.8675, p = 0.058 | F(8,399)=2.1769, p = 0.028 |
| 10   | num1                 | F(4,366)=4.2597, p = 0.002                       | F(2,366)=0.9588, p = 0.384 | F(8,366)=1.4233, p = 0.185 |
| 11   | num1                 | F(4,364)=6.4075, p = 0                           | F(2,364)=0.2249, p = 0.799 | F(8,364)=1.2606, p = 0.263 |
| 12   | num1                 | F(4,490)=3.9053, p = 0.004                       | F(2,490)=1.1902, p = 0.305 | F(8,490)=0.6286, p = 0.754 |
| 13   | num1                 | F(4,251)=5.7273, p = 0                           | F(2,251)=0.9275, p = 0.396 | F(8,251)=1.2411, p = 0.273 |
| 14   | num1                 | F(4,186)=3.5545, p = 0.008                       | F(2,186)=1.1998, p = 0.304 | F(8,186)=0.6334, p = 0.749 |
| 15   | num1                 | F(4,233)=4.4063, p = 0.002                       | F(2,233)=1.138, p = 0.322  | F(8,233)=0.3761, p = 0.933 |
| 16   | num1                 | F(4,316)=3.6533, p = 0.006                       | F(2,316)=1.4135, p = 0.245 | F(8,316)=0.8235, p = 0.582 |
| 17   | num2                 | F(4,177)=4.5348, p = 0.002                       | F(2,177)=0.2742, p = 0.761 | F(8,177)=0.6772, p = 0.711 |
| 18   | num2                 | F(4,176)=4.1623, p = 0.003                       | F(2,176)=0.8853, p = 0.414 | F(8,176)=0.8814, p = 0.533 |
| 19   | num2                 | F(4,147)=3.6633, p = 0.007                       | F(2,147)=0.929, p = 0.397  | F(8,147)=0.5183, p = 0.841 |
| 20   | num2                 | F(4,145)=3.7461, p = 0.006                       | F(2,145)=0.514, p = 0.599  | F(8,145)=0.5375, p = 0.827 |
| 21   | num2                 | F(4,298)=3.4934, p = 0.008                       | F(2,298)=0.7184, p = 0.488 | F(8,298)=1.0979, p = 0.364 |
| 22   | num2                 | F(4,253)=3.5881, p = 0.007                       | F(2,253)=0.2355, p = 0.79  | F(8,253)=0.454, p = 0.887  |
| 23   | num3                 | F(4,213)=3.4856, p = 0.009                       | F(2,213)=0.6473, p = 0.524 | F(8,213)=0.5014, p = 0.854 |
| 24   | num3                 | F(4,184)=3.6183, p = 0.007                       | F(2,184)=0.5629, p = 0.571 | F(8,184)=0.6608, p = 0.725 |
| 25   | num3                 | F(4,472)=5.1242, p = 0                           | F(2,472)=2.8061, p = 0.062 | F(8,472)=0.809, p = 0.595  |
| 26   | num3                 | F(4,410)=3.7563, p = 0.005                       | F(2,410)=4.5228, p = 0.011 | F(8,410)=1.3146, p = 0.233 |
| 27   | num3                 | F(4,496)=5.8789, p = 0                           | F(2,496)=0.1179, p = 0.889 | F(8,496)=1.4538, p = 0.173 |
| 28   | num4                 | F(4,176)=3.926, p = 0.004                        | F(2,176)=1.1196, p = 0.329 | F(8,176)=0.6298, p = 0.752 |
| 29   | num4                 | F(4,178)=3.9175, p = 0.004                       | F(2,178)=0.4244, p = 0.655 | F(8,178)=0.6897, p = 0.7   |
| 30   | num4                 | F(4,267)=4.5852, p = 0.001                       | F(2,267)=0.6043, p = 0.547 | F(8,267)=0.8609, p = 0.55  |
| 31   | num4                 | F(4,371)=3.6503, p = 0.006                       | F(2,371)=1.9928, p = 0.138 | F(8,371)=0.5894, p = 0.787 |
| 32   | num4                 | F(4,430)=3.4615, p = 0.008                       | F(2,430)=0.3739, p = 0.688 | F(8,430)=0.513, p = 0.847  |

|    |      |                            |                            |                            |
|----|------|----------------------------|----------------------------|----------------------------|
| 33 | num4 | F(4,420)=4.4972, p = 0.001 | F(2,420)=1.1432, p = 0.32  | F(8,420)=1.1135, p = 0.353 |
| 34 | num4 | F(4,459)=6.5488, p = 0     | F(2,459)=2.8234, p = 0.06  | F(8,459)=1.3186, p = 0.232 |
| 35 | num4 | F(4,333)=3.4399, p = 0.009 | F(2,333)=3.3226, p = 0.037 | F(8,333)=1.5331, p = 0.145 |
| 36 | num4 | F(4,308)=4.2385, p = 0.002 | F(2,308)=0.1141, p = 0.892 | F(8,308)=0.9124, p = 0.506 |
| 37 | num5 | F(4,323)=5.0184, p = 0.001 | F(2,323)=1.9782, p = 0.14  | F(8,323)=0.3722, p = 0.935 |
| 38 | num5 | F(4,188)=3.5707, p = 0.008 | F(2,188)=1.1655, p = 0.314 | F(8,188)=0.5456, p = 0.821 |
| 39 | num5 | F(4,307)=5.1489, p = 0     | F(2,307)=0.0322, p = 0.968 | F(8,307)=0.4935, p = 0.861 |
| 40 | num5 | F(4,260)=5.1953, p = 0     | F(2,260)=0.945, p = 0.39   | F(8,260)=0.682, p = 0.707  |
| 41 | num5 | F(4,234)=4.65, p = 0.001   | F(2,234)=0.7971, p = 0.452 | F(8,234)=0.8709, p = 0.542 |
| 42 | num5 | F(4,232)=3.7216, p = 0.006 | F(2,232)=0.0802, p = 0.923 | F(8,232)=1.3969, p = 0.199 |
| 43 | num5 | F(4,484)=3.6509, p = 0.006 | F(2,484)=0.1205, p = 0.887 | F(8,484)=0.7686, p = 0.631 |
| 44 | num5 | F(4,458)=12.8202, p = 0    | F(2,458)=0.7574, p = 0.469 | F(8,458)=0.4219, p = 0.908 |
| 45 | num5 | F(4,192)=4.4432, p = 0.002 | F(2,192)=2.0198, p = 0.135 | F(8,192)=1.8229, p = 0.075 |
| 46 | num5 | F(4,415)=3.8044, p = 0.005 | F(2,415)=1.618, p = 0.2    | F(8,415)=0.5316, p = 0.832 |
| 47 | num5 | F(4,685)=14.1207, p = 0    | F(2,685)=1.9687, p = 0.141 | F(8,685)=1.4958, p = 0.156 |
| 48 | num5 | F(4,371)=6.7422, p = 0     | F(2,371)=0.6683, p = 0.513 | F(8,371)=1.6257, p = 0.115 |
| 49 | num5 | F(4,359)=4.1619, p = 0.003 | F(2,359)=0.1355, p = 0.873 | F(8,359)=0.4252, p = 0.906 |
| 50 | num5 | F(4,355)=13.4938, p = 0    | F(2,355)=1.832, p = 0.162  | F(8,355)=0.3219, p = 0.958 |
| 51 | num5 | F(4,354)=6.4972, p = 0     | F(2,354)=0.6433, p = 0.526 | F(8,354)=0.9821, p = 0.45  |
| 52 | num5 | F(4,288)=3.3897, p = 0.01  | F(2,288)=2.1069, p = 0.123 | F(8,288)=1.2445, p = 0.273 |
| 53 | num5 | F(4,460)=5.4865, p = 0     | F(2,460)=1.4027, p = 0.247 | F(8,460)=0.7622, p = 0.636 |

775

776 Table S1. Summary of the two-way ANOVA for every recorded unit. Unit: id of the  
777 recorded unit. Preferred numerosity: numerosity stimulus that elicited the strongest  
778 response in the corresponding unit. ANOVA results (F-statistics and p-value) are  
779 summarized for the factor “Stimulus type” (radius-fixed, area-fixed, perimeter-fixed),  
780 “Numerosity” (numerosity “one” to “five”), or interaction between them.

781

782

| Unit | Preferred numerosity | Post hoc analysis, p-value |              |              |              |              |
|------|----------------------|----------------------------|--------------|--------------|--------------|--------------|
|      |                      | num1                       | num2         | num3         | num4         | num5         |
| 1    | num1                 |                            | <b>0.016</b> | <b>0.022</b> | <b>0.019</b> | <b>0.007</b> |
| 2    | num1                 |                            | 0.081        | <b>0.019</b> | <b>0.011</b> | <b>0.021</b> |
| 3    | num1                 |                            | 0.988        | 0.903        | 0.303        | <b>0.003</b> |
| 4    | num1                 |                            | 0.974        | 0.315        | <b>0.002</b> | 0.209        |
| 5    | num1                 |                            | 0.890        | 0.650        | <b>0.000</b> | <b>0.027</b> |
| 6    | num1                 |                            | 0.176        | 0.063        | <b>0.001</b> | <b>0.001</b> |
| 7    | num1                 |                            | <b>0.035</b> | <b>0.048</b> | <b>0.006</b> | <b>0.020</b> |
| 8    | num1                 |                            | <b>0.031</b> | <b>0.001</b> | <b>0.001</b> | <b>0.023</b> |
| 9    | num1                 |                            | 0.788        | 0.174        | <b>0.000</b> | <b>0.000</b> |
| 10   | num1                 |                            | 0.465        | <b>0.002</b> | <b>0.009</b> | 0.169        |
| 11   | num1                 |                            | <b>0.033</b> | <b>0.000</b> | <b>0.000</b> | <b>0.001</b> |
| 12   | num1                 |                            | <b>0.036</b> | <b>0.013</b> | 0.090        | <b>0.004</b> |
| 13   | num1                 |                            | 0.221        | 0.120        | <b>0.001</b> | <b>0.000</b> |
| 14   | num1                 |                            | 0.147        | 0.142        | 0.061        | <b>0.004</b> |
| 15   | num1                 |                            | <b>0.031</b> | <b>0.002</b> | 0.084        | <b>0.004</b> |
| 16   | num1                 |                            | 0.304        | <b>0.048</b> | <b>0.008</b> | <b>0.014</b> |
| 17   | num2                 | 0.447                      |              | 0.986        | 0.362        | <b>0.001</b> |
| 18   | num2                 | <b>0.001</b>               |              | <b>0.027</b> | <b>0.025</b> | 0.206        |
| 19   | num2                 | <b>0.023</b>               |              | 0.945        | 0.065        | 0.063        |
| 20   | num2                 | <b>0.013</b>               |              | <b>0.017</b> | 0.826        | 0.608        |
| 21   | num2                 | 0.973                      |              | 0.181        | 0.125        | <b>0.011</b> |
| 22   | num2                 | <b>0.040</b>               |              | 0.312        | 0.075        | <b>0.004</b> |
| 23   | num3                 | <b>0.005</b>               | 0.807        |              | 0.760        | 0.123        |
| 24   | num3                 | <b>0.006</b>               | 0.094        |              | 0.504        | 0.899        |
| 25   | num3                 | <b>0.001</b>               | 0.913        |              | 0.998        | 0.796        |
| 26   | num3                 | <b>0.005</b>               | 0.059        |              | 0.370        | 0.857        |
| 27   | num3                 | <b>0.000</b>               | <b>0.024</b> |              | 0.798        | 0.683        |
| 28   | num4                 | <b>0.003</b>               | 0.282        | 0.120        |              | <b>0.016</b> |
| 29   | num4                 | <b>0.020</b>               | 0.051        | 0.213        |              | 0.999        |
| 30   | num4                 | 0.710                      | <b>0.001</b> | <b>0.028</b> |              | 0.103        |
| 31   | num4                 | <b>0.007</b>               | 0.369        | 0.813        |              | 0.998        |
| 32   | num4                 | 0.059                      | 0.059        | 0.936        |              | 0.999        |
| 33   | num4                 | 0.065                      | <b>0.007</b> | 0.864        |              | 1.000        |
| 34   | num4                 | <b>0.000</b>               | 0.092        | 0.419        |              | 0.968        |
| 35   | num4                 | <b>0.004</b>               | 0.628        | 0.616        |              | 0.850        |
| 36   | num4                 | <b>0.003</b>               | 0.194        | 0.981        |              | 0.928        |
| 37   | num5                 | <b>0.002</b>               | <b>0.002</b> | <b>0.007</b> | 0.054        |              |
| 38   | num5                 | <b>0.022</b>               | 0.287        | 0.995        | 0.999        |              |
| 39   | num5                 | <b>0.000</b>               | 0.148        | 0.653        | 0.803        |              |
| 40   | num5                 | <b>0.000</b>               | <b>0.026</b> | 0.525        | 0.214        |              |
| 41   | num5                 | <b>0.001</b>               | <b>0.021</b> | 0.226        | <b>0.012</b> |              |
| 42   | num5                 | <b>0.008</b>               | 0.150        | <b>0.010</b> | 0.431        |              |
| 43   | num5                 | <b>0.004</b>               | 0.097        | 0.111        | 0.725        |              |
| 44   | num5                 | <b>0.000</b>               | <b>0.000</b> | 0.750        | 0.851        |              |
| 45   | num5                 | <b>0.015</b>               | <b>0.032</b> | <b>0.001</b> | 0.080        |              |
| 46   | num5                 | 0.070                      | <b>0.002</b> | 0.428        | 0.069        |              |



|    |      |              |              |              |       |
|----|------|--------------|--------------|--------------|-------|
| 47 | num5 | <b>0.000</b> | <b>0.000</b> | <b>0.016</b> | 0.868 |
| 48 | num5 | <b>0.000</b> | <b>0.003</b> | 0.251        | 0.901 |
| 49 | num5 | <b>0.003</b> | 0.394        | 0.940        | 0.997 |
| 50 | num5 | <b>0.000</b> | <b>0.000</b> | <b>0.034</b> | 0.078 |
| 51 | num5 | <b>0.000</b> | <b>0.009</b> | <b>0.014</b> | 0.801 |
| 52 | num5 | 0.074        | <b>0.023</b> | 0.988        | 0.798 |
| 53 | num5 | <b>0.006</b> | <b>0.004</b> | 0.276        | 0.998 |

783

784 Table S2. The post hoc analysis of the two-way ANOVA based on the Tukey-Kramer  
785 method summarising p-values for every pairwise comparison between the most-  
786 preferred and other numerosities. Significant p-values <0.05 are highlighted in bold.

787
